# Supplementary material for: Evaluation of Household Preparedness and Risk Factors for Cutaneous Leishmaniasis (CL) Using the Community Assessment for Public Health Emergency Response (CASPER) Method in Pakistan
Source: MDPI journal article supplement (doi:10.3390/ijerph19095068), 2022-04-21
Supplement: s1 [file s1]

**Table.S1** Demographic data of study area.  
Source: Pakistan Bureau of Statistics

| <b>District</b> | <b>Tehsil</b>  | <b>Check No</b> | <b>Population</b> |
|-----------------|----------------|-----------------|-------------------|
| Layyah          | Karor Lal-Esan | 110/TDA         | 1,658             |
| Layyah          | Karor Lal-Esan | 111/TDA         | 1,398             |
| Layyah          | Karor Lal-Esan | 116/TDA         | 1,963             |
| Layyah          | Karor Lal-Esan | 120/TDA         | 684               |
| Layyah          | Karor Lal-Esan | 131/TDA         | 1,829             |
| Layyah          | Karor Lal-Esan | 150/TDA         | 1,780             |
| Layyah          | Karor Lal-Esan | 152/TDA         | 1,868             |
| Layyah          | Karor Lal-Esan | 168/TDA         | 2,681             |
| Layyah          | Karor Lal-Esan | 275/TDA         | 1,764             |
| Layyah          | Karor Lal-Esan | 279/TDA         | 3,329             |
| Layyah          | Karor Lal-Esan | 282/TDA         | 2,798             |
| Layyah          | Karor Lal-Esan | 305/TDA         | 2,513             |
| Layyah          | Karor Lal-Esan | 316/TDA         | 1,481             |
| Layyah          | Karor Lal-Esan | 319/TDA         | 372               |
| Layyah          | Karor Lal-Esan | 325/TDA         | 417               |
| Layyah          | Karor Lal-Esan | 339/TDA         | 3,215             |
| Layyah          | Karor Lal-Esan | 347/TDA         | 2,458             |
| Layyah          | Karor Lal-Esan | 348/TDA         | 1,136             |
| Layyah          | Karor Lal-Esan | 375/TDA         | 1,108             |
| Layyah          | Karor Lal-Esan | 380/TDA         | 1,347             |
| Layyah          | Karor Lal-Esan | 407/TDA         | 749               |
| Layyah          | Karor Lal-Esan | 419/TDA         | 1,505             |
| Layyah          | Karor Lal-Esan | 464/TDA         | 1,388             |
| Layyah          | Karor Lal-Esan | 230/TDA         | 2,017             |
| Layyah          | Karor Lal-Esan | 230A/TDA        | 922               |
| Layyah          | Karor Lal-Esan | 239A/TDA        | 1,224             |
| Layyah          | Karor Lal-Esan | 241/TDA         | 1,428             |
| Layyah          | Karor Lal-Esan | 242/TDA         | 618               |
| Layyah          | Karor Lal-Esan | 243/TDA         | 1,152             |
| Layyah          | Karor Lal-Esan | 246/TDA         | 864               |

**Table.S2** Sample size of the population.

| Sample Size before applying exclusion criteria |                                      |                         | 540        |
|------------------------------------------------|--------------------------------------|-------------------------|------------|
| Samples Excluded                               | Exclusion Criteria                   | Questionnaires excluded | Percentage |
|                                                | Participants less than the age of 18 | 15                      | 2.7        |
|                                                | Incomplete response                  | 25                      | 4.6        |
|                                                | Total excluded questionnaires        | 40                      | 7.4        |
| Sample size after applying exclusion criteria  |                                      |                         | 500        |
